# Supplementary material for: Copper(ii) complexes of a furan-containing aroylhydrazonic ligand: syntheses, structural studies, solution chemistry and interaction with HSA
Source: Royal Society of Chemistry journal article supplement (doi:10.1039/d3dt02597g), 2023-01-01
Supplement: d3dt02597g1.pdf [file d3dt02597g1.pdf]

**Copper(II) complexes of a furan-containing aroylhydrazonic ligand: syntheses,  
structural studies, solution chemistry and interaction with HSA**

Fagner da Silva Moura, Ygor S. Sobrinho, Carolina Stellet, Jilder D. P. Serna,  
Carolina B. P. Ligiero, Maurício I. Yoguim, Daphne S. Cukierman, Renata Diniz,  
Odivaldo C. Alves, Nelson H. Morgon, Aguinaldo R. de Souza, Nicolás A. Rey\*

*\*nicoarey@puc-rio.br*

**Supplementary Information**

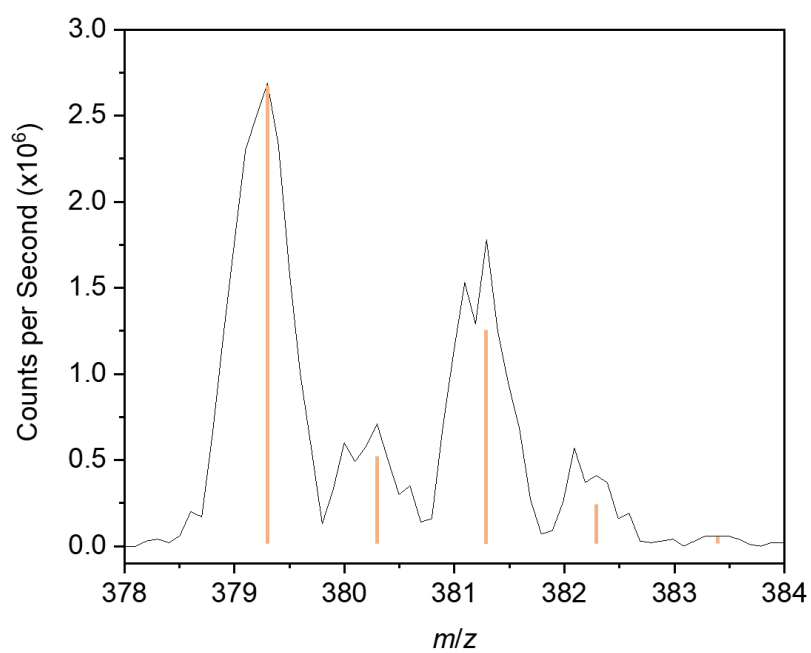

**Figure S1.** Experimental and calculated (vertical orange lines) isotope distribution pattern of the ESI-MS(+) peak related to the species  $[\text{Cu}(\text{HL})\text{DMF}]^+$ .

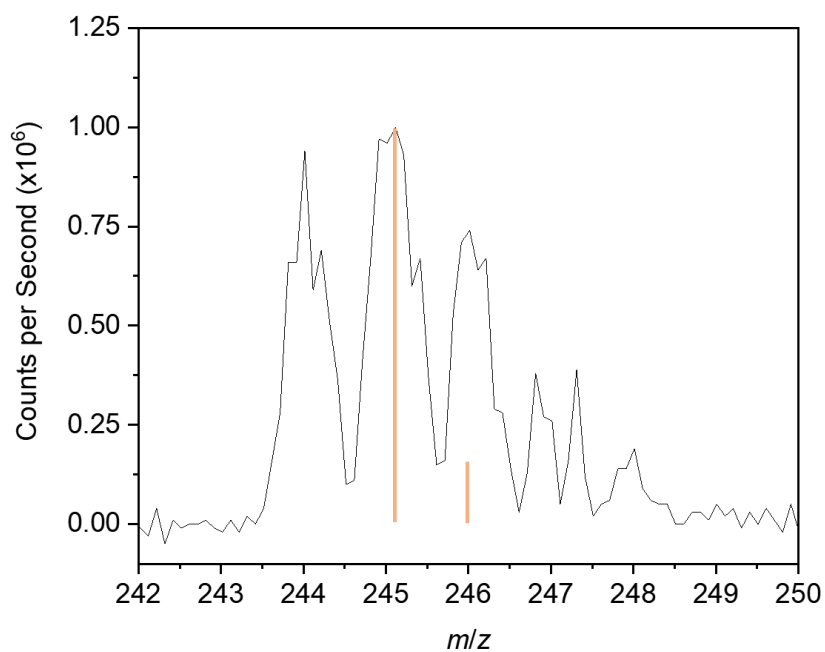

**Figure S2.** Experimental and calculated (vertical orange lines) isotope distribution pattern of the ESI-MS(+) peak related to the species  $[\text{H}_2\text{L}+\text{H}]^+$ .

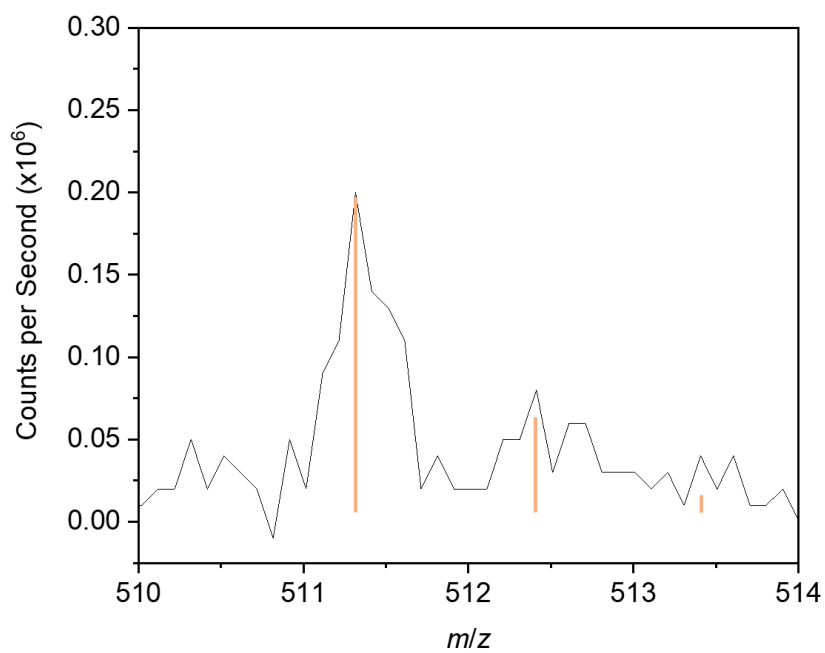

**Figure S3.** Experimental and calculated (vertical orange lines) isotope distribution pattern of the ESI-MS(+) peak related to the species  $[2\mathbf{H}_2\mathbf{L}+\mathbf{Na}]^+$ .

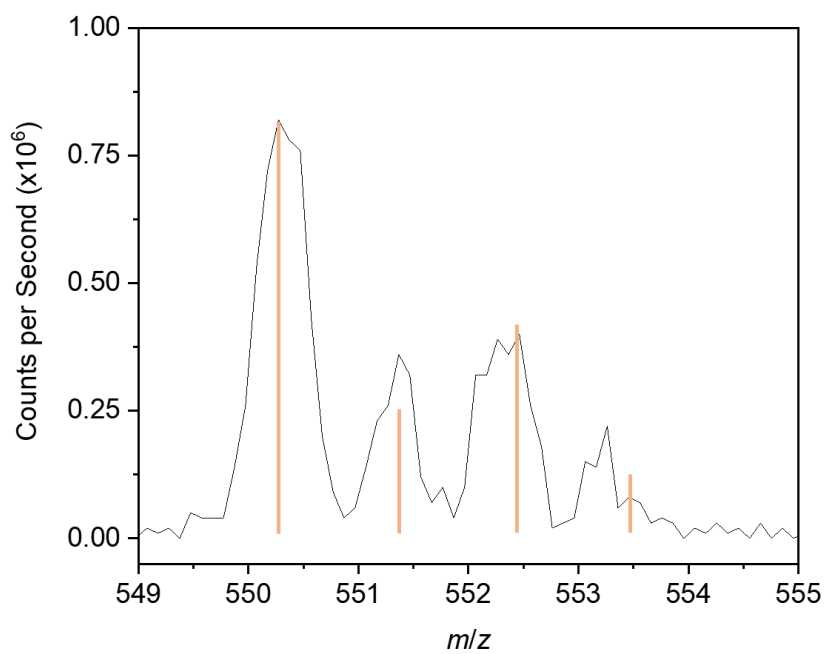

**Figure S4.** Experimental and calculated (vertical orange lines) isotope distribution pattern of the ESI-MS(+) peak related to the species  $[\mathbf{Cu}(\mathbf{HL})_2+\mathbf{H}]^+$ .

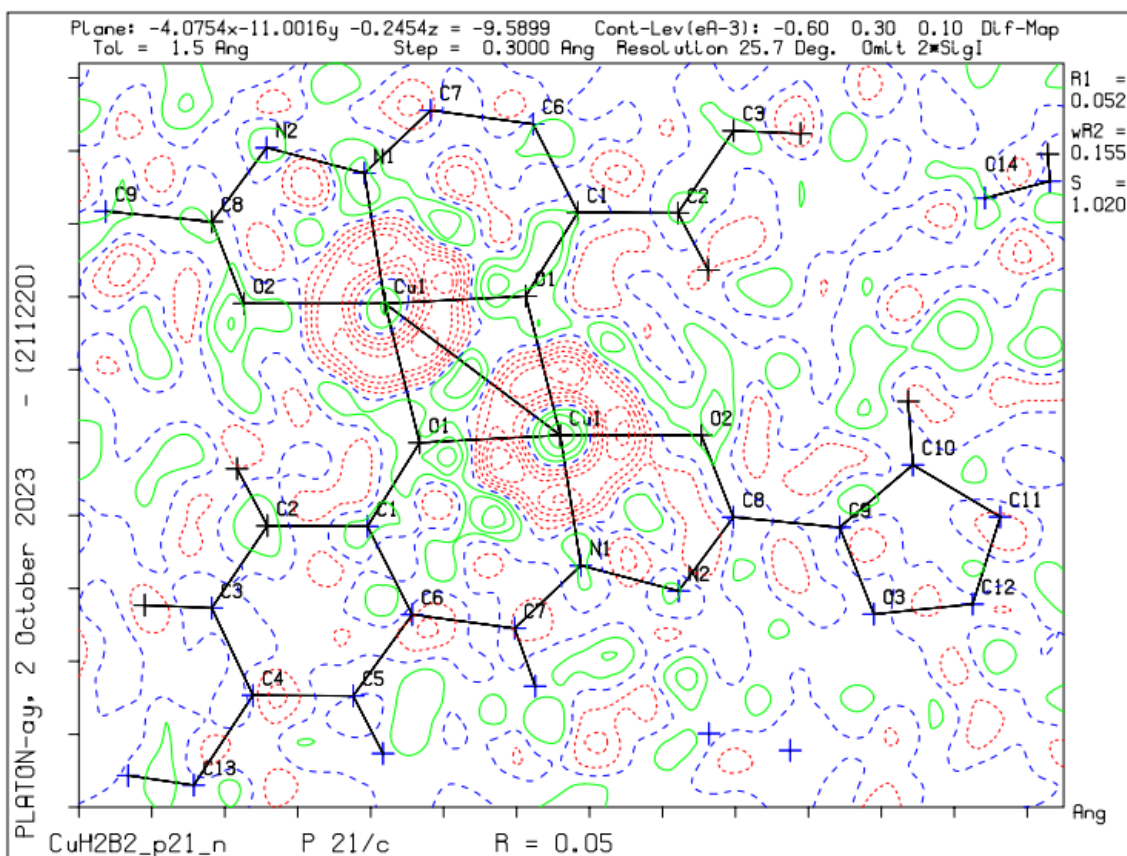

**Figure S5.** Fo-Fc map on the bis( $\mu$ -phenoxo)dicopper(II) motif plane of complex **2**.

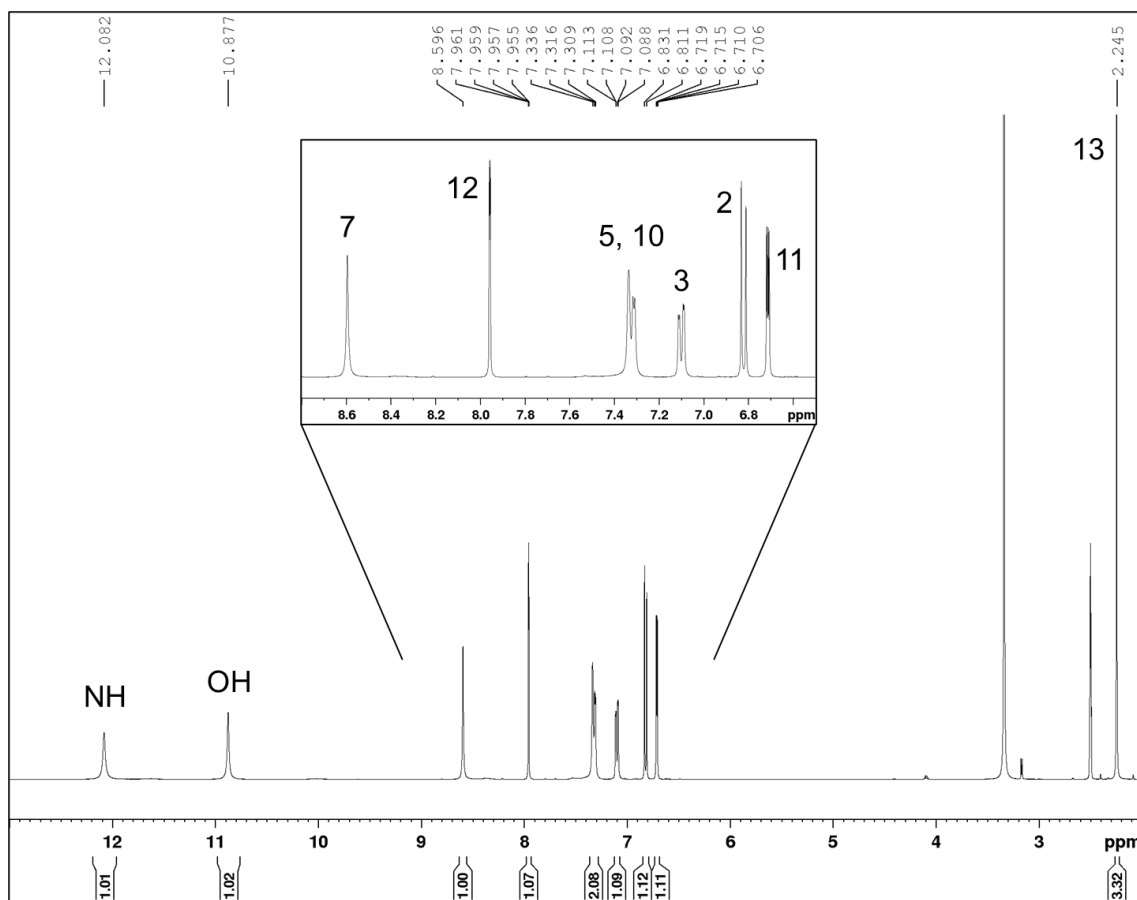

Figure S6.  $^1\text{H}$  NMR spectrum (400 MHz) of  $\text{H}_2\text{L}$  in  $\text{DMSO-}d_6$  at 298 K.

**Table S1.** Experimental crystallographic details for **H<sub>2</sub>L** and its complexes **1** and **2**.

| Crystal                                                                                                        | <b>H<sub>2</sub>L</b>                                               | <b>Complex 1</b>                                                   | <b>Complex 2</b>                                                              |
|----------------------------------------------------------------------------------------------------------------|---------------------------------------------------------------------|--------------------------------------------------------------------|-------------------------------------------------------------------------------|
| Chemical formula                                                                                               | C <sub>13</sub> H <sub>14</sub> O <sub>4</sub> N <sub>2</sub>       | C <sub>13</sub> H <sub>13</sub> O <sub>4</sub> N <sub>2</sub> ClCu | C <sub>32</sub> H <sub>36</sub> O <sub>8</sub> N <sub>4</sub> Cu <sub>2</sub> |
| <i>M<sub>r</sub></i> (g mol <sup>-1</sup> )                                                                    | 262.26                                                              | 360.24                                                             | 731.73                                                                        |
| Crystal system, space group                                                                                    | Orthorhombic, <i>P</i> 2 <sub>1</sub> 2 <sub>1</sub> 2 <sub>1</sub> | Monoclinic, <i>P</i> 2 <sub>1</sub> / <i>c</i>                     | Monoclinic, <i>P</i> 2 <sub>1</sub> / <i>c</i>                                |
| Temperature (K)                                                                                                | 296                                                                 | 293                                                                | 296                                                                           |
| <i>a</i> , <i>b</i> , <i>c</i> (Å)                                                                             | 4.9316(2), 12.4514(5),                                              | 12.6740(4), 6.9206(2),                                             | 6.2379(5), 14.5843(10),                                                       |
| β (°)                                                                                                          | –                                                                   | 91.109(3)                                                          | 94.394(2)                                                                     |
| <i>V</i> (Å <sup>3</sup> )                                                                                     | 1273.49(9)                                                          | 1416.74(7)                                                         | 1595.39(2)                                                                    |
| <i>Z</i>                                                                                                       | 4                                                                   | 4                                                                  | 2                                                                             |
| Radiation type                                                                                                 | Mo <i>K</i> α                                                       | Mo <i>K</i> α                                                      | Mo <i>K</i> α                                                                 |
| μ (mm <sup>-1</sup> )                                                                                          | 0.103                                                               | 1.746                                                              | 1.390                                                                         |
| Crystal size (mm)                                                                                              | 0.72 × 0.14 × 0.12                                                  | 0.20 × 0.05 × 0.04                                                 | 0.07 × 0.08 × 0.35                                                            |
| Data collection                                                                                                |                                                                     |                                                                    |                                                                               |
| Diffractionmeter                                                                                               | Bruker D8 Venture                                                   | Rigaku-Oxford-Diffraction                                          | Bruker D8 Venture                                                             |
| Measured/Independent/Observed                                                                                  | 22889, 2577, 2224                                                   | 31799, 4009, 2953                                                  | 25923, 3029, 2193                                                             |
| <i>R</i> <sub>int</sub>                                                                                        | 0.043                                                               | 0.048                                                              | 0.079                                                                         |
| Refinement                                                                                                     |                                                                     |                                                                    |                                                                               |
| <i>R</i> [ <i>F</i> <sup>2</sup> > 2σ( <i>F</i> <sup>2</sup> )], <i>wR</i> ( <i>F</i> <sup>2</sup> ), <i>S</i> | 0.040, 0.126, 1.09                                                  | 0.035, 0.088, 1.04                                                 | 0.052, 0.175, 1.21                                                            |
| No. of parameters                                                                                              | 231                                                                 | 194                                                                | 213                                                                           |
| No. of restraints                                                                                              | 238 (disorder in the furan ring)                                    | 0                                                                  | 0                                                                             |
| Δρ <sub>max</sub> , Δρ <sub>min</sub> (e Å <sup>-3</sup> )                                                     | 0.147, -0.150                                                       | 0.414, -0.260                                                      | 0.750, -0.640                                                                 |

**Table S2.** Selected bond distances for **H<sub>2</sub>L**. DFT data [level of theory B3LYP/6-311++G(2d,p)] of the optimized structure in the gas phase were included for comparison.

| <b>Bond</b> | <b>XRD / Å</b> | <b>Calculated / Å</b> |
|-------------|----------------|-----------------------|
| O1–C1       | 1.351(3)       | 1.342                 |
| O2–C8       | 1.237(3)       | 1.209                 |
| N1–C7       | 1.287(3)       | 1.284                 |
| N1–N2       | 1.379(3)       | 1.355                 |
| N2–C8       | 1.343(3)       | 1.388                 |
| C6–C7       | 1.443(3)       | 1.448                 |

**Table S3.** Selected bond angles for **H<sub>2</sub>L**. DFT data [level of theory B3LYP/6-311++G(2d,p)] of the optimized structure in the gas phase were included for comparison.

| <b>Angle</b> | <b>XRD / °</b> | <b>Calculated / °</b> |
|--------------|----------------|-----------------------|
| C2–C1–O1     | 118.4(2)       | 118.1                 |
| C1–C6–C7     | 123.6(2)       | 121.8                 |
| C6–C7–N1     | 122.9(2)       | 121.7                 |
| C7–N1–N2     | 114.4(2)       | 119.0                 |
| N1–N2–C8     | 120.1(2)       | 119.8                 |
| N2–C8–C9     | 114.4(10)      | 112.8                 |
| N2–C8–O2     | 123.7(2)       | 123.6                 |
| C8–C9–O3     | 116.0(17)      | 115.9                 |
| C9–O3–C12    | 108.5(12)      | 107.1                 |

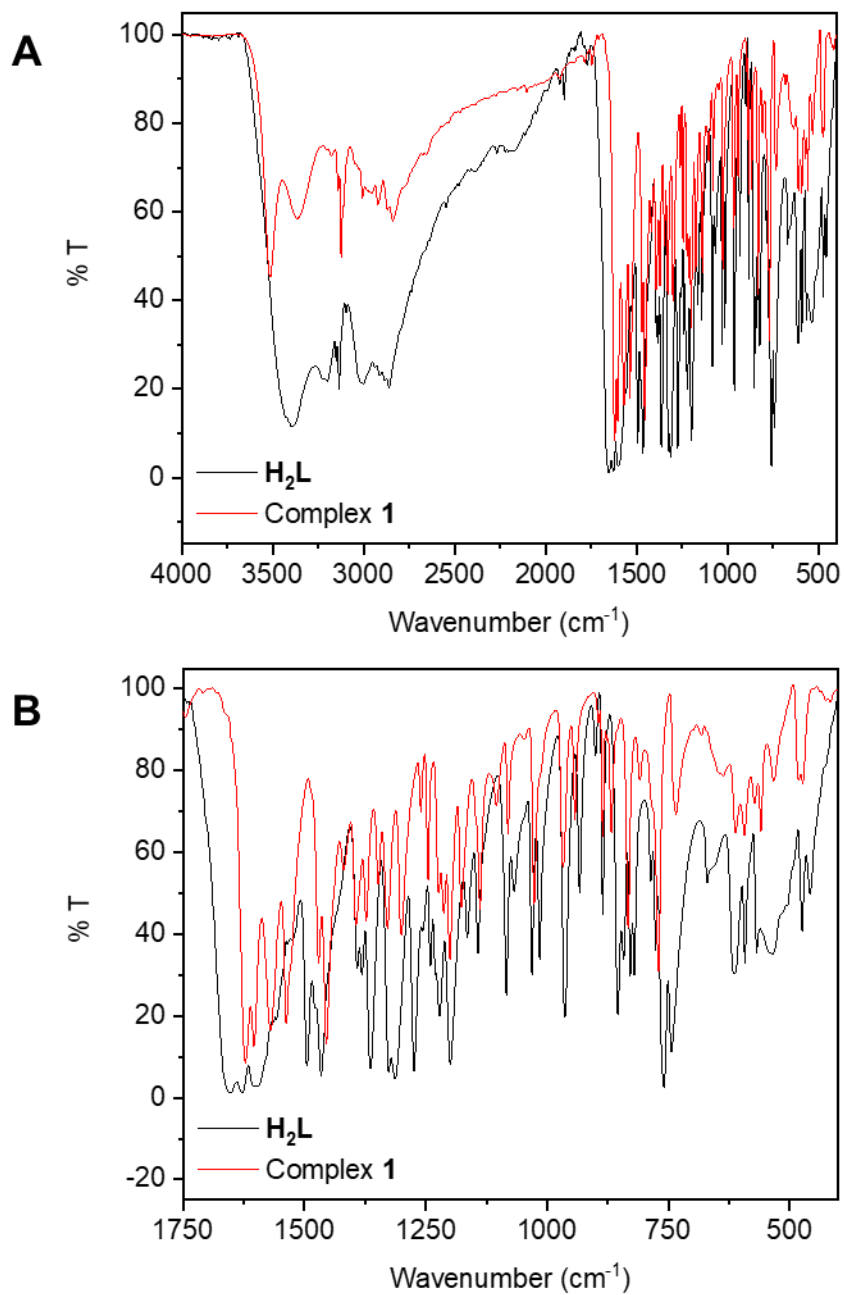

**Figure S7.** Overlapping of the mid-infrared spectra of **H<sub>2</sub>L** and complex **1** in KBr, at room temperature, (A) from 4000 to 400 cm<sup>-1</sup> and (B) expansion of the fingerprint region from 1750 to 400 cm<sup>-1</sup>.



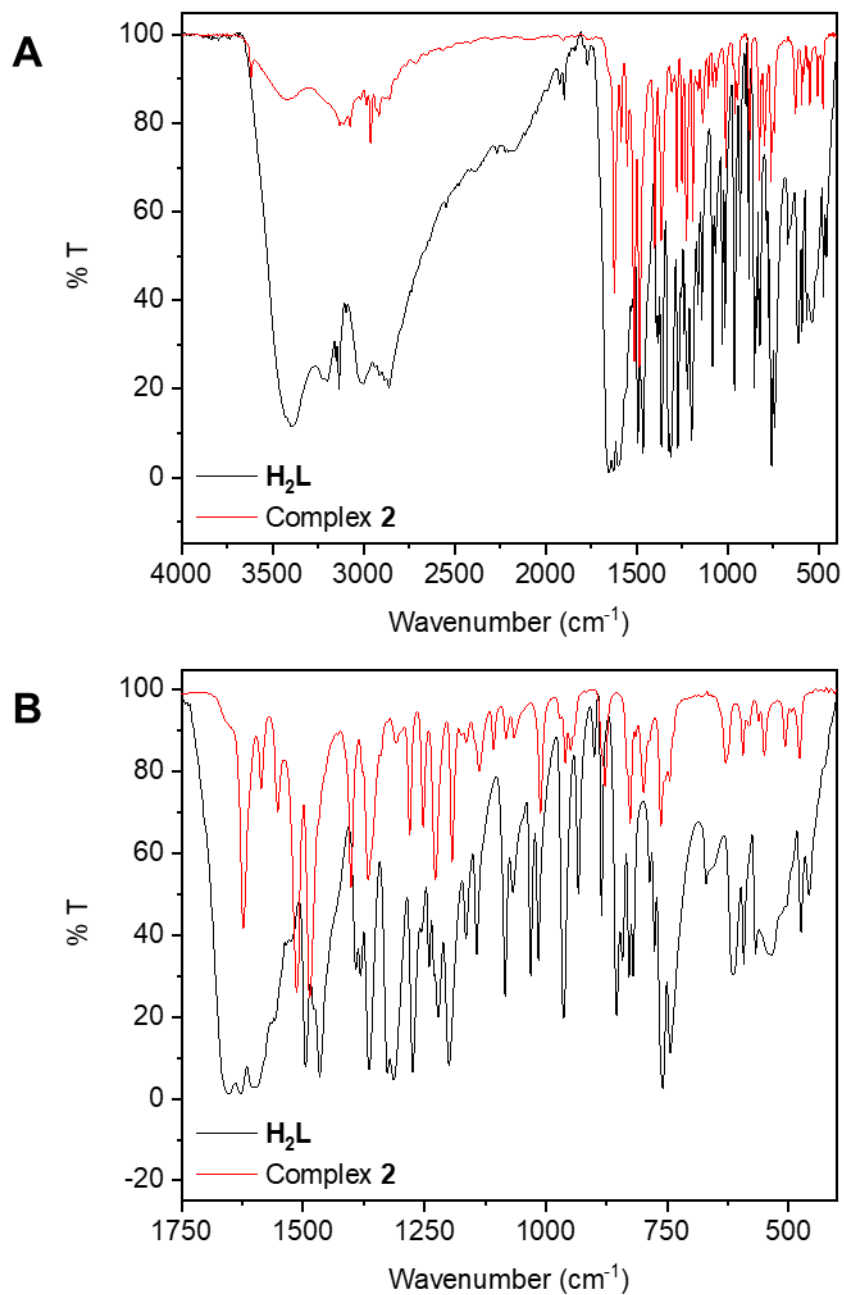

**Figure S8.** Overlapping of the mid-infrared spectra of **H<sub>2</sub>L** and complex **2** in KBr, at room temperature, (A) from 4000 to 400 cm<sup>-1</sup> and (B) expansion of the fingerprint region from 1750 to 400 cm<sup>-1</sup>.

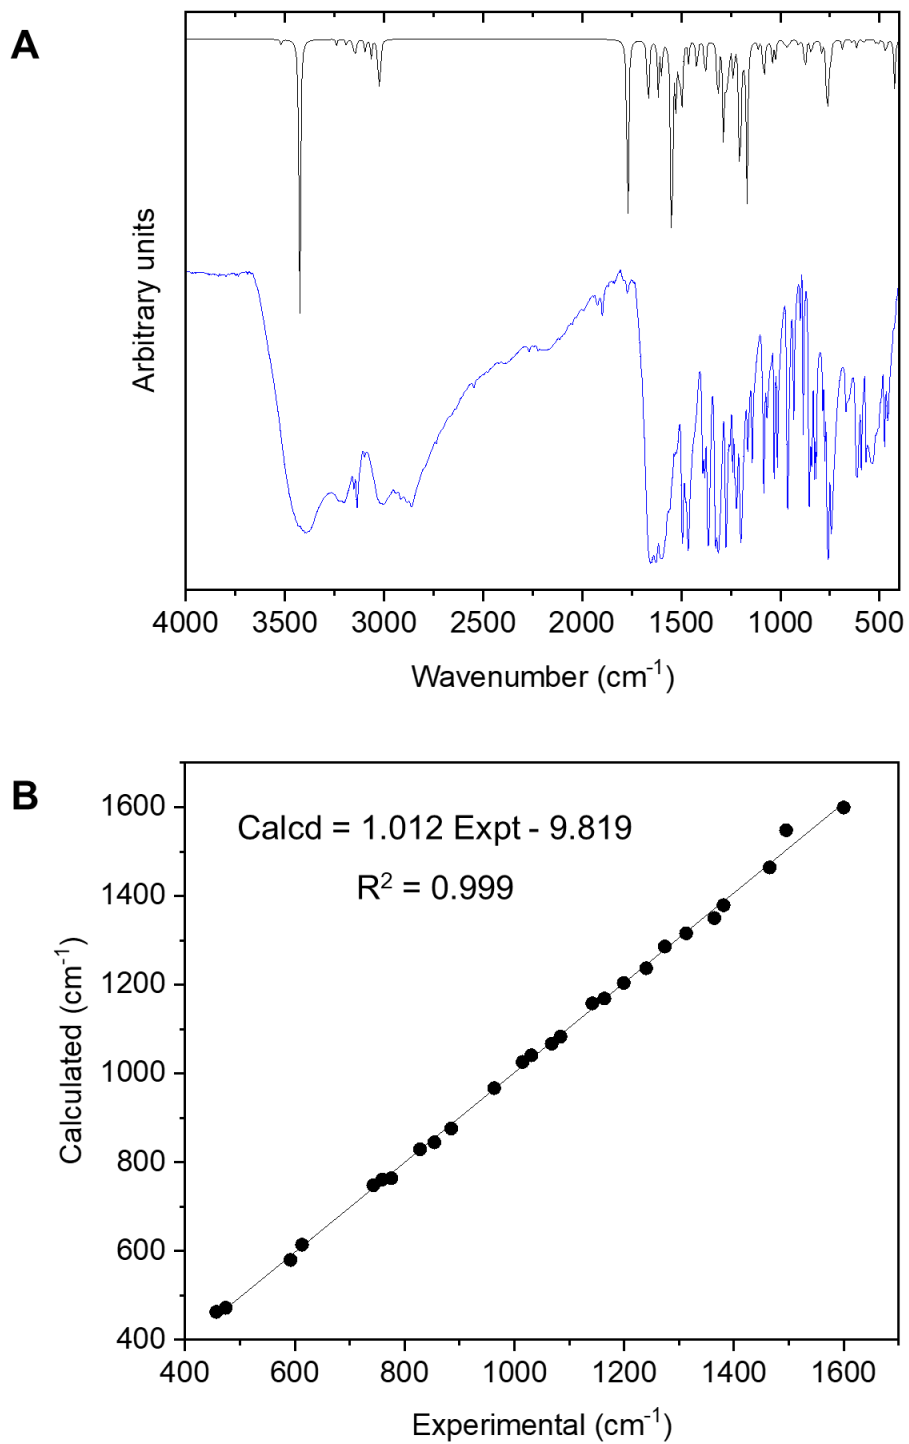

**Figure S9.** Mid-infrared spectra of  $\text{H}_2\text{L}$ . (A) Calculated (black) [gas phase, level of theory B3LYP/6-311++G(2d,p)] and experimental (blue) (KBr pellets at room temperature). (B) Plot of experimental *versus* calculated frequencies.

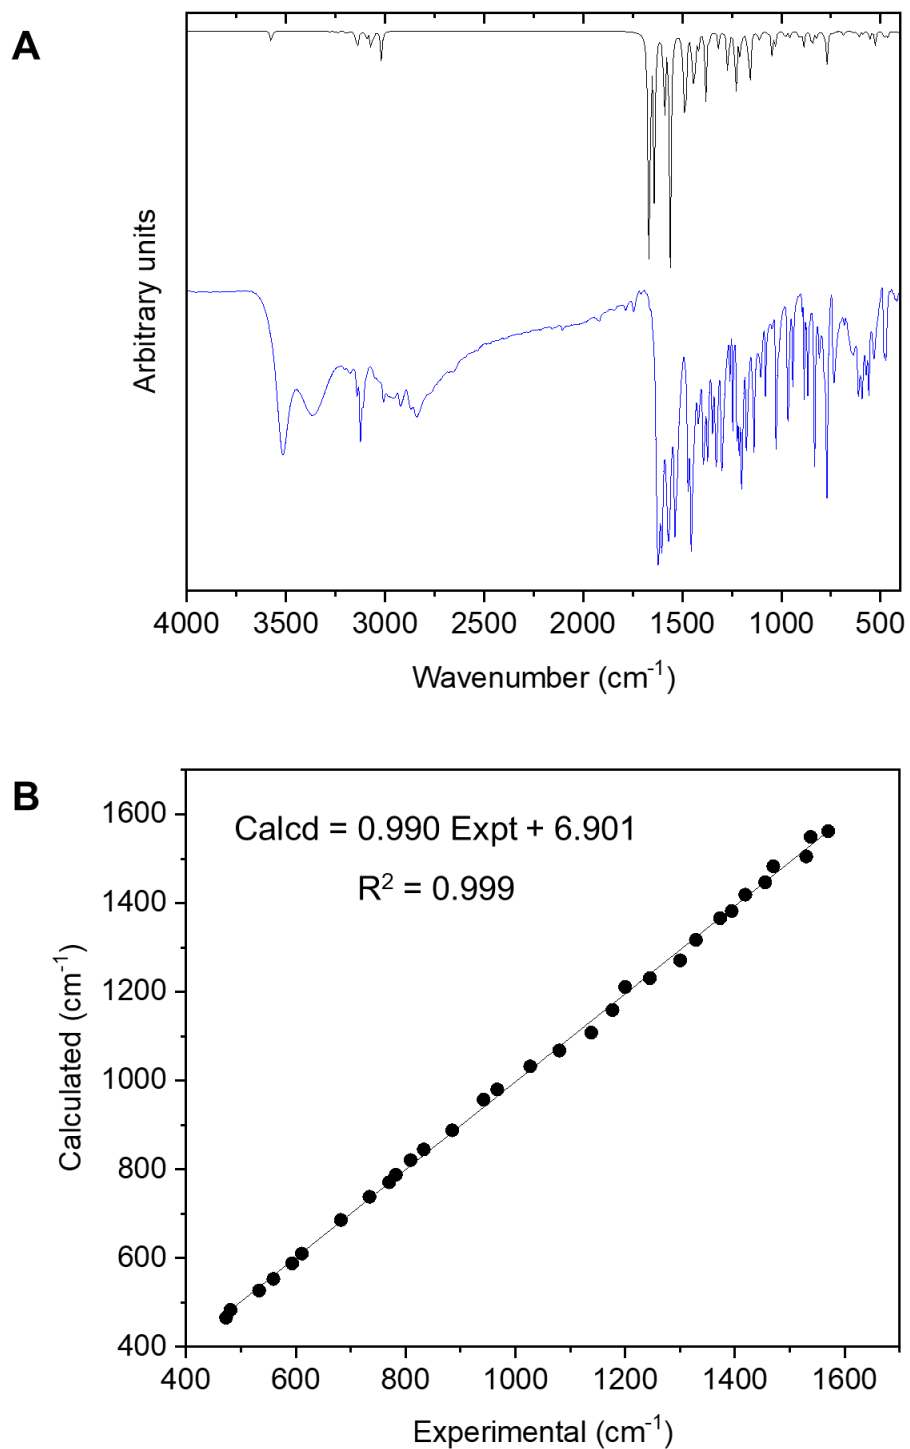

**Figure S10.** Mid-infrared spectra of complex **1**. **(A)** Calculated (black) [gas phase, level of theory B3LYP/6-311++G(2d,p)] and experimental (blue) (KBr pellets at room temperature). **(B)** Plot of experimental *versus* calculated frequencies.

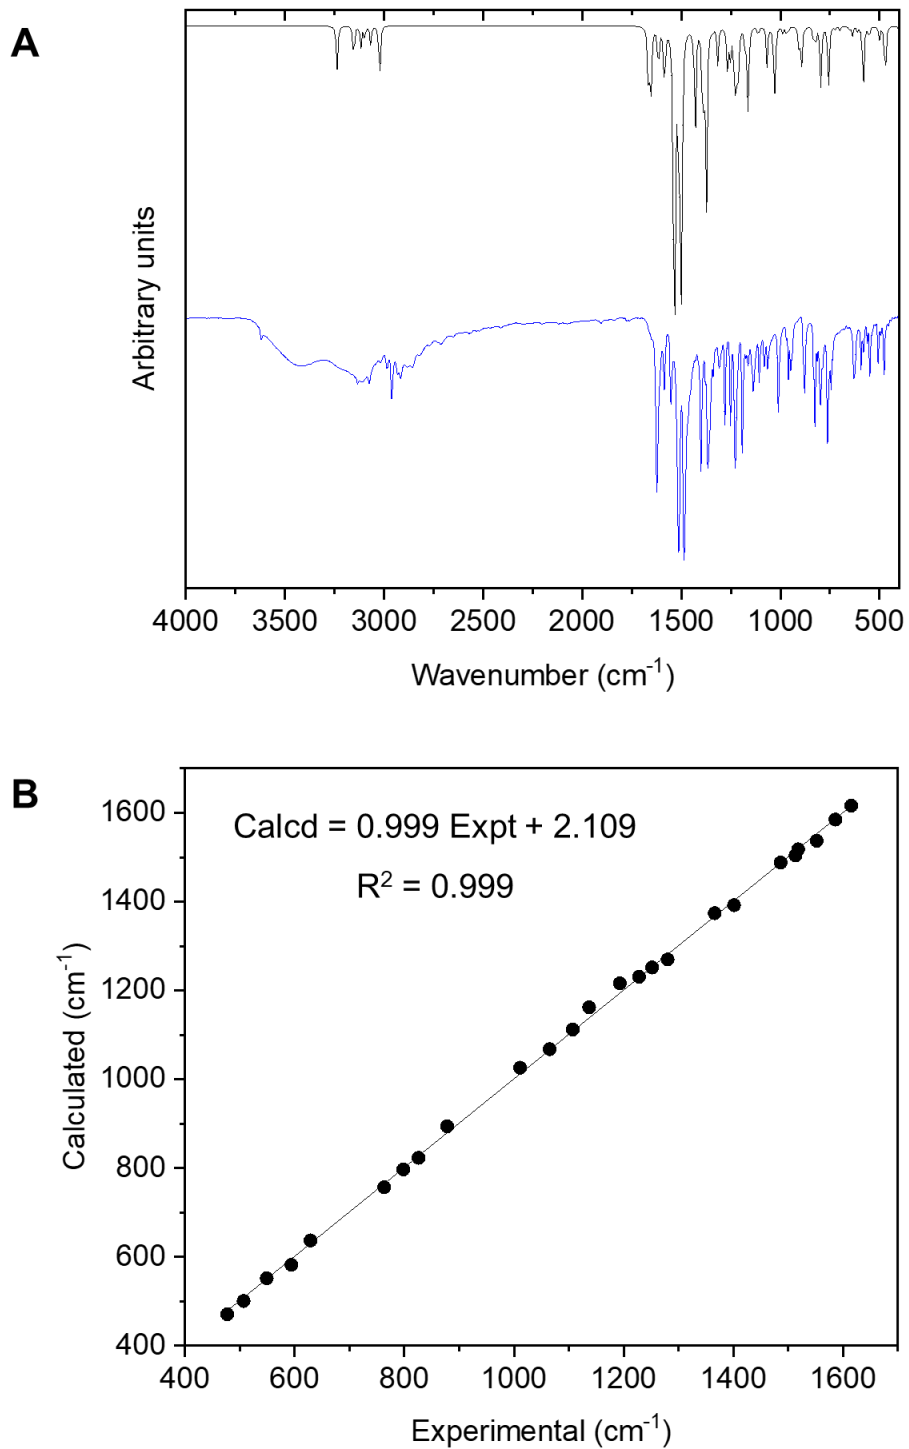

**Figure S11.** Mid-infrared spectra of complex **2**. (A) Calculated (black) [gas phase, level of theory B3LYP/6-311++G(2d,p)] and experimental (blue) (KBr pellets at room temperature). (B) Plot of experimental *versus* calculated frequencies. For the sake of simplicity, calculations involving complex **2** were performed disregarding the axial ligands.

**Table S4.** Experimental and calculated [gas phase, level of theory B3LYP/6-311++G(2d,p)] mid-IR data for the main absorptions related to the hydrazone ligand **H<sub>2</sub>L**, along with proposed assignments.

| Experimental (cm <sup>-1</sup> ) | Calculated (cm <sup>-1</sup> ) | Assignment                                                                                                |
|----------------------------------|--------------------------------|-----------------------------------------------------------------------------------------------------------|
| 3225                             | 3519                           | $\nu(\text{N-H})$ hydrazone                                                                               |
| 3202                             | 3425                           | $\nu(\text{O-H})$ phenol                                                                                  |
| 3152                             | 3154                           | $\nu(\text{C-H})$ phenol                                                                                  |
| 3136                             | 3142                           | $\nu(\text{C-H})$ phenol                                                                                  |
| 3098                             | –                              | $\nu(\text{C-H})$                                                                                         |
| 3017                             | 3028                           | $\nu(\text{C-H})$ azomethine                                                                              |
| 3002                             | –                              | $\nu(\text{C-H})$                                                                                         |
| 2940                             | 3094                           | $\nu_{\text{as}}(\text{C-H})$ methyl                                                                      |
| 2914                             | 3065                           | $\nu_{\text{as}}(\text{C-H})$ methyl                                                                      |
| 2861                             | 3020                           | $\nu_{\text{sym}}(\text{C-H})$ methyl                                                                     |
| 1653**                           | 1771                           | $\nu(\text{C=O}) + \delta(\text{N-N-H})$ hydrazone                                                        |
| 1628**                           | 1668                           | $\nu(\text{C=N})$ hydrazone + $\nu(\text{C=C})$ phenol ring                                               |
| 1600**                           | 1599                           | $\nu_{\text{as}}(\text{C=C})$ furan ring                                                                  |
| 1495*                            | 1548                           | $\delta(\text{C-N-H})$ hydrazone                                                                          |
| 1465*                            | 1464                           | $\delta(\text{C-O-H})$ phenol + $\delta(\text{N-N-H})$ hydrazone                                          |
| 1381                             | 1379                           | $\delta(\text{OC-N-H}) + \delta(\text{H-C=N})$ hydrazone                                                  |
| 1364*                            | 1350                           | $\nu(\text{C=C})$ phenol ring + $\delta(\text{H-C=N})$ hydrazone                                          |
| 1326*                            | –                              | $\nu(\text{C-O})$ phenol                                                                                  |
| 1313*                            | 1316                           | $\delta(\text{C=C-H})$ phenol + $\delta(\text{H-C=N})$ hydrazone                                          |
| 1274*                            | 1286                           | $\nu(\text{C-O})$ furan + $\delta(\text{OC-N-H})$ hydrazone                                               |
| 1240                             | 1237                           | $\delta(\text{C-O-H}) + \delta(\text{C=C-H})$ phenol                                                      |
| 1199*                            | 1204                           | $\delta(\text{C=C-H})$ furan + $\delta(\text{N-N-H})$ hydrazone                                           |
| 1164                             | 1169                           | $\nu(\text{N-N}) + \delta(\text{O-C-H})$ furan                                                            |
| 1142                             | 1158                           | $\delta(\text{C=C-H})$ phenol                                                                             |
| 1084                             | 1083                           | Furan breathing mode + $\delta(\text{OC-N-H})$ hydrazone                                                  |
| 1068                             | 1067                           | $\delta(\text{CH}_3)$                                                                                     |
| 1031                             | 1041                           | $\delta(\text{C=C-H})$ furan                                                                              |
| 1015                             | 1026                           | $\delta(\text{CH}_3)$                                                                                     |
| 963                              | 967                            | $\delta_{\text{out-of-plane}}(\text{C-H})$ phenol + $\delta_{\text{out-of-plane}}(\text{C-H})$ azomethine |
| 885                              | 876                            | $\delta(\text{C=C-O})$ furan + $\delta(\text{O=C-N})$ hydrazone                                           |
| 854                              | 845                            | $\delta_{\text{out-of-plane}}(\text{C-H})$ phenol + $\delta(\text{CH}_3)$                                 |
| 828                              | 829                            | $\delta_{\text{out-of-plane}}(\text{C-H})$ furan                                                          |
| 776                              | 764                            | $\delta_{\text{out-of-plane}}(\text{C-H})$ furan + $\delta_{\text{out-of-plane}}(\text{O-H})$ phenol      |
| 759**                            | 761                            | $\delta_{\text{out-of-plane}}(\text{O-H})$ phenol + $\delta_{\text{out-of-plane}}(\text{C-H})$ furan      |
| 743*                             | 748                            | $\delta_{\text{out-of-plane}}(\text{O-H}) + \delta_{\text{out-of-plane}}(\text{C-H})$ phenol              |
| 613                              | 614                            | $\delta_{\text{out-of-plane}}(\text{C-H})$ furan                                                          |
| 592                              | 580                            | $\delta_{\text{out-of-plane}}(\text{C-H})$ phenol + $\delta(\text{CH}_3)$                                 |
| 474                              | 472                            | $\delta_{\text{out-of-plane}}(\text{N-H})$ hydrazone + $\delta(\text{C=C-O})$ phenol                      |
| 457                              | 463                            | $\delta(\text{C=C-C})$ phenol                                                                             |

\*\* and \* are the most intense bands

**Table S5.** Experimental and calculated [gas phase, level of theory B3LYP/6-311++G(2d,p)] mid-IR data for the main absorptions related to the mononuclear copper complex **1**, along with proposed assignments.

| Experimental (cm <sup>-1</sup> ) | Calculated (cm <sup>-1</sup> ) | Assignment                                                                                    |
|----------------------------------|--------------------------------|-----------------------------------------------------------------------------------------------|
| 3514*                            | 3574                           | $\nu(\text{N-H})$ hydrazone                                                                   |
| 3203                             | 3238                           | $\nu_{\text{as}}(\text{C-H})$ furan                                                           |
| 3141                             | 3148                           | $\nu_{\text{as}}(\text{C-H})$ phenol                                                          |
| 3124                             | 3134                           | $\nu(\text{C-H})$ phenol                                                                      |
| 3052                             | 3072                           | $\nu(\text{C-H})$ azomethine                                                                  |
| 3008                             | –                              | $\nu(\text{C-H})$                                                                             |
| 2922                             | 3094                           | $\nu_{\text{as}}(\text{C-H})$ methyl                                                          |
| 2868                             | 3060                           | $\nu_{\text{as}}(\text{C-H})$ methyl                                                          |
| 2840                             | 3017                           | $\nu_{\text{sym}}(\text{C-H})$ methyl                                                         |
| 1622**                           | 1666                           | $\nu(\text{C=O}) + \nu(\text{C=N})$ hydrazone                                                 |
| 1604**                           | 1641                           | $\nu(\text{C=N})$ hydrazone + $\nu(\text{C=O})$                                               |
| 1570**                           | 1562                           | $\delta(\text{C-N-H})$ hydrazone                                                              |
| 1538**                           | 1549                           | $\nu(\text{C=C})$ phenol ring                                                                 |
| 1530                             | 1505                           | $\delta_{\text{as}}(\text{CH}_3)$                                                             |
| 1470                             | 1483                           | $\nu_{\text{sym}}(\text{C=C})$ furan ring                                                     |
| 1455**                           | 1447                           | $\delta(\text{C=C-C})$ phenol + $\delta(\text{C=C-H})$ furan                                  |
| 1419                             | 1419                           | $\delta_{\text{sym}}(\text{CH}_3)$                                                            |
| 1394                             | 1382                           | $\delta(\text{H-C=N})$ hydrazone + $\delta(\text{C=C-H})$ phenol                              |
| 1373                             | 1366                           | $\delta(\text{C=C-H}) + \nu(\text{C-O})$ phenol + $\delta(\text{H-C=N})$ hydrazone            |
| 1329*                            | 1317                           | $\delta(\text{OC-N-H}) + \delta(\text{H-C=N})$ hydrazone                                      |
| 1300*                            | 1271                           | $\delta(\text{C=C-H})$ phenol                                                                 |
| 1245                             | 1231                           | $\delta(\text{H-C=N})$ hydrazone + $\nu(\text{C=C})$ phenol                                   |
| 1200*                            | 1211                           | $\delta(\text{C-N-H})$ hydrazone + $\delta(\text{O-C-H})$ furan                               |
| 1177                             | 1159                           | $\delta(\text{C=C-H})$ furan + $\delta(\text{OC-N-H}) + \delta(\text{C=C-H})$ phenol          |
| 1138                             | 1108                           | $\nu(\text{N-N})$                                                                             |
| 1080                             | 1068                           | $\delta(\text{CH}_3)$                                                                         |
| 1027                             | 1032                           | $\delta(\text{CH}_3)$                                                                         |
| 967                              | 980                            | $\delta(\text{O-C-H})$ furan + $\delta(\text{CH}_3) + \delta(\text{C=C-H})$ phenol            |
| 942                              | 957                            | $\delta_{\text{out-of-plane}}(\text{C-H})$ azomethine                                         |
| 885                              | 888                            | $\delta(\text{C=C-O})$ furan + $\delta(\text{O=C-N})$ hydrazone                               |
| 833*                             | 845                            | $\delta_{\text{out-of-plane}}(\text{C-H})$ phenol + $\delta(\text{CH}_3)$                     |
| 809                              | 821                            | $\delta(\text{C=C-C})$ phenol + $\nu(\text{C-CH}_3)$                                          |
| 782                              | 788                            | Phenol breathing mode                                                                         |
| 770*                             | 771                            | $\delta_{\text{out-of-plane}}(\text{C-H})$ furan                                              |
| 734                              | 738                            | $\delta_{\text{out-of-plane}}(\text{C=O}) + \delta_{\text{out-of-plane}}(\text{C=C-H})$ furan |
| 682                              | 686                            | $\delta(\text{C=C-C})$ phenol                                                                 |
| 611                              | 610                            | $\delta_{\text{out-of-plane}}(\text{C=C-H})$ furan                                            |
| 593                              | 588                            | $\nu(\text{Cu-N}) + \delta(\text{C=C-O})$ phenol                                              |
| 559                              | 553                            | $\delta(\text{OC-N-N})$ hydrazone                                                             |
| 533                              | 527                            | $\nu(\text{Cu-O2}) + \nu(\text{Cu-O1})$                                                       |
| 481                              | 483                            | $\delta(\text{C=C-C})$ phenol                                                                 |
| 473                              | 466                            | $\delta(\text{O-Cu-N})$                                                                       |

\*\* and \* are the most intense bands

**Table S6.** Experimental and calculated [gas phase, level of theory B3LYP/6-311++G(2d,p)] mid-IR data for the main absorptions related to the dinuclear copper complex **2**, along with proposed assignments.

| Experimental (cm <sup>-1</sup> ) | Calculated (cm <sup>-1</sup> ) | Assignment                                                                                           |
|----------------------------------|--------------------------------|------------------------------------------------------------------------------------------------------|
| 3133                             | 3153                           | $\nu_{\text{as}}(\text{C-H})$ phenol                                                                 |
| 3108                             | 3117                           | $\nu(\text{C-H})$ azomethine                                                                         |
| 3076                             | –                              | $\nu(\text{C-H})$                                                                                    |
| 2984                             | 3097                           | $\nu_{\text{as}}(\text{C-H})$ methyl                                                                 |
| 2916                             | 3068                           | $\nu_{\text{as}}(\text{C-H})$ methyl                                                                 |
| 2857                             | 3022                           | $\nu_{\text{sym}}(\text{C-H})$ methyl                                                                |
| 1623*                            | 1665                           | $\nu(\text{C=N})$ hydrazone                                                                          |
| 1615                             | 1616                           | $\nu_{\text{as}}(\text{C=C})$ furan ring                                                             |
| 1586                             | 1585                           | $\nu_{\text{as}}(\text{C=C})$ phenol ring                                                            |
| 1552                             | 1537                           | $\nu(\text{OC-N}) + \nu(\text{C=C})$ furan + $\delta(\text{C=C-H})$ phenol                           |
| 1518*                            | 1518                           | $\delta(\text{C=C-H})$ phenol                                                                        |
| 1513**                           | 1504                           | $\delta(\text{CH}_3) + \delta(\text{C=C-H})$ furan + $\nu(\text{C=O})$ hydrazone                     |
| 1486**                           | 1488                           | $\delta_{\text{as}}(\text{CH}_3)$                                                                    |
| 1401*                            | 1392                           | $\delta(\text{H-C=N})$ hydrazone + $\delta(\text{C=C-H})$ phenol                                     |
| 1366*                            | 1374                           | $\delta(\text{H-C=N})$ hydrazone + $\delta(\text{C=C-H})$ furan                                      |
| 1280                             | 1270                           | $\delta(\text{H-C=N})$ hydrazone + $\delta(\text{C=C-H})$ phenol                                     |
| 1252                             | 1252                           | $\delta(\text{C=C-H})$ furan                                                                         |
| 1228*                            | 1231                           | $\nu(\text{C-O})$ phenol + $\delta(\text{C=C-H})$ phenol                                             |
| 1193*                            | 1216                           | $\delta(\text{O-C-H})$ furan + $\delta(\text{C=C-H})$ phenol                                         |
| 1137                             | 1162                           | $\delta(\text{O-C-H})$ furan                                                                         |
| 1107                             | 1112                           | $\delta(\text{C=C-H})$ furan                                                                         |
| 1065                             | 1068                           | $\nu(\text{N-N}) + \delta(\text{C=C-H})$ furan                                                       |
| 1011                             | 1026                           | $\delta(\text{CH}_3)$                                                                                |
| 878                              | 894                            | $\delta(\text{O=C-N})$ hydrazone + $\delta(\text{C=C-H})$ furan                                      |
| 826                              | 823                            | $\delta_{\text{out-of-plane}}(\text{C-H})$ phenol + $\delta_{\text{out-of-plane}}(\text{C-H})$ furan |
| 798                              | 797                            | Phenol breathing mode                                                                                |
| 763*                             | 757                            | $\delta_{\text{out-of-plane}}(\text{C-H})$ furan                                                     |
| 629                              | 637                            | $\delta_{\text{out-of-plane}}(\text{C-O-C})$ furan                                                   |
| 594                              | 582                            | $\nu(\text{Cu-O2})$                                                                                  |
| 549                              | 552                            | $\delta(\text{OC-N-N})$ hydrazone + $\delta(\text{C=C=N})$ azomethine                                |
| 507                              | 501                            | Phenol deformation mode                                                                              |
| 477                              | 471                            | Bending of coordinated hydrazones                                                                    |

\*\* and \* are the most intense bands

In the region below 1620  $\text{cm}^{-1}$ , the correlation between theory and experiment was remarkable for the three compounds, with a plot of experimental *versus* calculated frequencies giving straight lines of slopes 1.012 (**H<sub>2</sub>L**), 0.990 (**1**) and 0.999 (**2**). The  $R^2$  value for all of them was 0.999. In this spectral window, from 1620 to 400  $\text{cm}^{-1}$ , the only computational failure observed was related to the phenol C–O stretching mode in **H<sub>2</sub>L**, which could not be identified amongst the calculated vibrations. The program also failed in predicting accurately the methyl group stretching frequencies, systematically overestimating them. For **H<sub>2</sub>L** and **1**, something similar happened with the  $\nu(\text{N–H})$  and  $\nu(\text{C=O})$  vibrations, while this is probably associated to the involvement of these groups in intermolecular H bonding with structural water molecules in the crystal, as evidenced by the XRD analysis. It is worth noting that intermolecular interactions were not considered during the DFT calculations. Specifically in the case of the ligand, phenol  $\nu(\text{O–H})$  and azomethine  $\nu(\text{C=N})$  modes were also miscalculated since they are involved in an intramolecular H bond. A similar fact was observed with the  $\nu(\text{C=N})$  vibration in complex **2**, overestimated by around 40  $\text{cm}^{-1}$ .

**Table S7.** Main bands in the UV-Vis spectra of complexes **1** and **2**, along with their molar absorptivities.

| Complex <b>1</b> |                                                   | Complex <b>2</b> |                                                   |
|------------------|---------------------------------------------------|------------------|---------------------------------------------------|
| $\lambda$ (nm)   | $\epsilon$ ( $\text{L mol}^{-1} \text{cm}^{-1}$ ) | $\lambda$ (nm)   | $\epsilon$ ( $\text{L mol}^{-1} \text{cm}^{-1}$ ) |
| 306              | 15,000 $\pm$ 200                                  | 308              | 27,700 $\pm$ 700                                  |
| 320              | 16,850 $\pm$ 150                                  | 320              | 33,450 $\pm$ 820                                  |
| 336              | 16,450 $\pm$ 150                                  | 336              | 32,150 $\pm$ 750                                  |
| 406              | 14,950 $\pm$ 200                                  | 404              | 30,900 $\pm$ 650                                  |
| 678              | 86 $\pm$ 1                                        | 630              | 190 $\pm$ 4                                       |



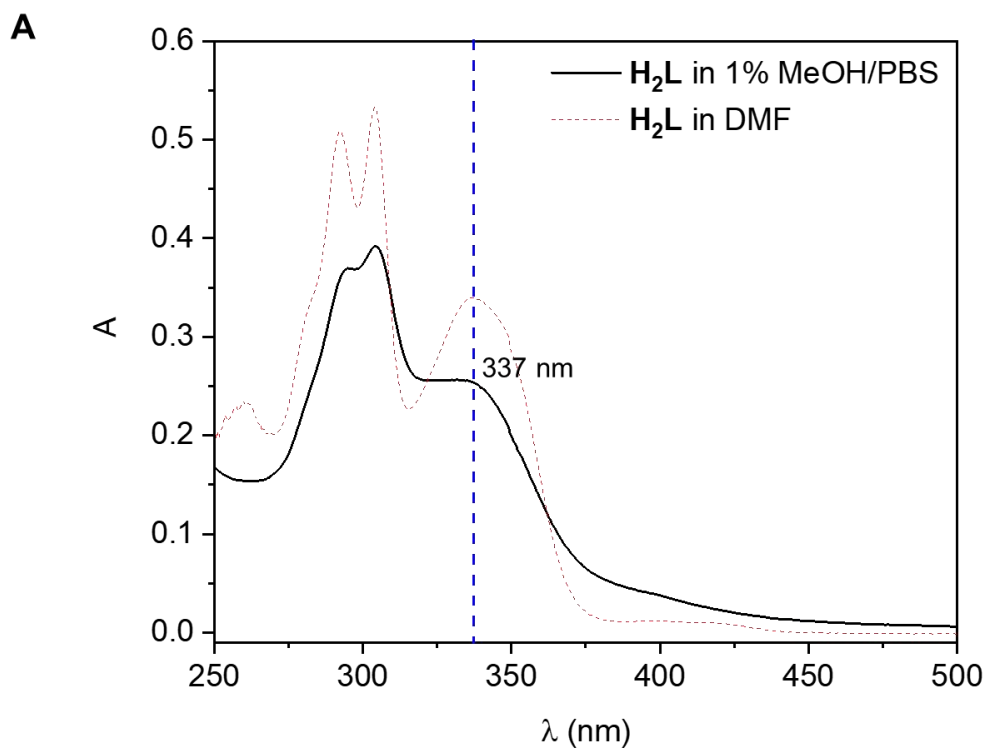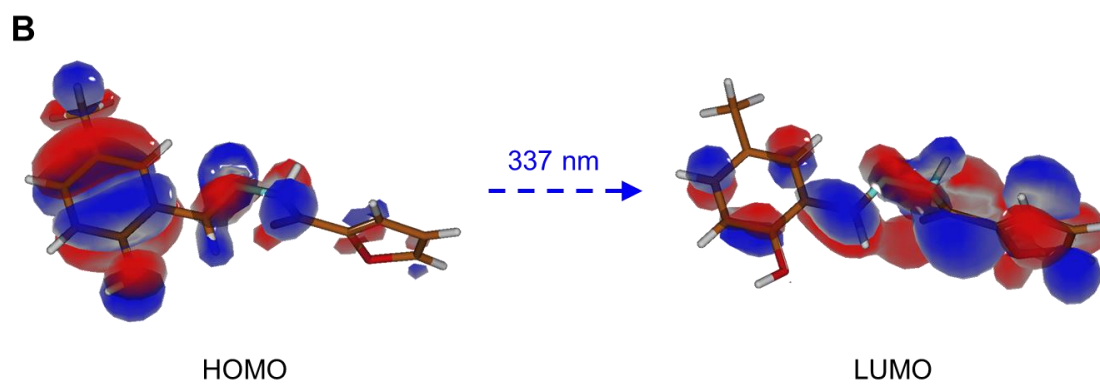

**Figure S12.** (A) UV-Vis spectra of ligand  $\text{H}_2\text{L}$  ( $2.0 \times 10^{-5} \text{ mol L}^{-1}$ ) in 1% MeOH / PBS, pH 7.4 (black solid curve) and in DMF (red dotted curve), at r.t. Position of the HOMO-LUMO calculated transition is given as a dashed blue line (B) Frontier orbitals that take part in the process.

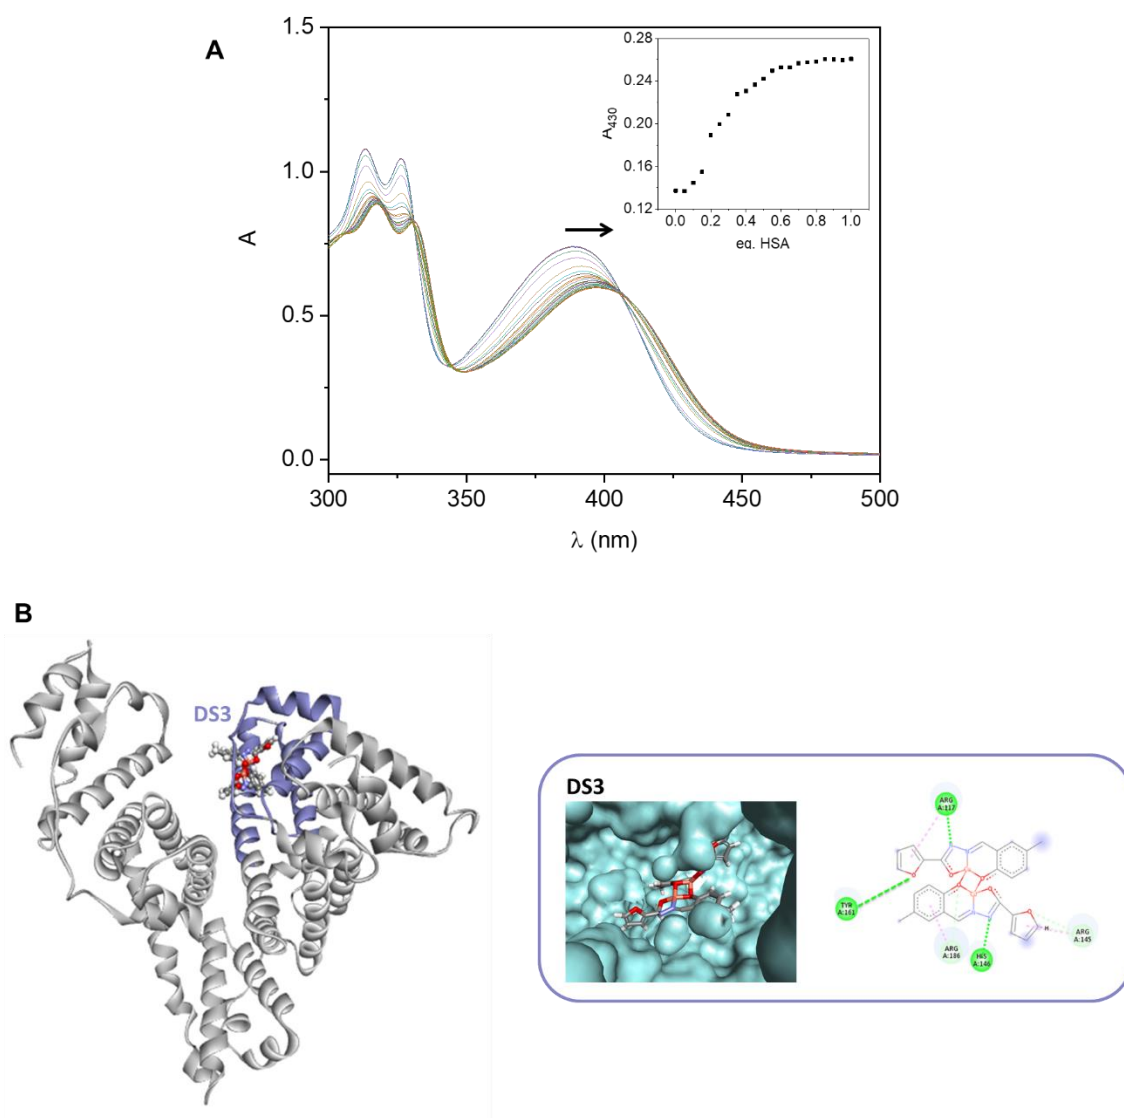

**Figure S13.** (A) UV-Vis titration of a  $2 \times 10^{-5}$  mol L<sup>-1</sup> solution of **2** (2% MeOH / PBS, pH 7.4) with HSA at 25 °C. *Inset:* absorbance at 430 nm as a function of HSA equivalents. (B) Molecular docking results with indication of pose and most probable interactions of the neutral, dimeric complex **2** at the DS3 site.
